# Supplementary material for: Association of mitochondrial DNA content, heteroplasmies and inter-generational transmission with autism
Source: PubMed Central journal article supplement (PMC9249801; doi:10.1038/s41467-022-30805-7), 2022-07-01
Supplement: 41467_2022_30805_MOESM2_ESM.pdf [file 41467_2022_30805_MOESM2_ESM.pdf]

File name: Supplementary Data 1

Description: mtDNA heteroplasmies identified in the SSC.
